# Supplementary material
Source: PubMed Central journal article supplement (PMC4135675)
Supplement: JB.01629-14_zjb999093241so1.pdf [file JB.01629-14_zjb999093241so1.pdf]

## SUPPLEMENTAL MATERIAL

**Table S1. Plasmids used in this study.**

| Plasmids                   | Description                                                                            | Reference  |
|----------------------------|----------------------------------------------------------------------------------------|------------|
| pMQ72                      | <i>Pseudomonas</i> expression vector; Gm <sup>r</sup>                                  | (1)        |
| pMQ30                      | allelic replacement; <i>sacB aacC1</i> ColE1 oriT CEN4 URA3                            | (1)        |
| pKO3- <i>lapG</i>          | single-crossover knockout vector for <i>lapG</i> derived from pKO3; Tet <sup>r</sup>   | (2, 3)     |
| pKO3- <i>lapA</i>          | single-crossover knockout vector for <i>lapA</i> , derived from pKO3: Tet <sup>r</sup> | (2)        |
| pNTerm-LapA                | pMQ72 expressing NTerm- <i>lapA</i> -6xHis; Gm <sup>r</sup>                            | (3)        |
| pNTerm-LapA $\Delta$ helix | pNTerm-LapA deletion of <i>lapA</i> codons A81-95A; Gm <sup>r</sup>                    | This study |
| pNTerm-LapA AA108-109RR    | pNTerm-LapA with mutation AA108-109RR in NTerm-LapA; Gm <sup>r</sup>                   | (3)        |
| pNTerm-Lap T107A           | pNTerm-LapA with mutation T107A in NTerm-LapA; Gm <sup>r</sup>                         | This Study |
| pNTerm-Lap A108R           | pNTerm-LapA with mutation A108R in NTerm-LapA; Gm <sup>r</sup>                         | This Study |
| pNTerm-Lap A109R           | pNTerm-LapA with mutation A109R in NTerm-LapA; Gm <sup>r</sup>                         | This Study |
| pNTerm-Lap A108W           | pNTerm-LapA with mutation A108W in NTerm-LapA; Gm <sup>r</sup>                         | This Study |
| pNTerm-Lap AA108-109WW     | pNTerm-LapA with mutation AA108-109WW in NTerm-LapA; Gm <sup>r</sup>                   | This Study |
| pNTerm-Lap A109W           | pNTerm-LapA with mutation A109W in NTerm-LapA; Gm <sup>r</sup>                         | This Study |
| pNTerm-Lap A108D           | pNTerm-LapA with mutation A108D in NTerm-LapA; Gm <sup>r</sup>                         | This Study |
| pNTerm-Lap AA108-109DD     | pNTerm-LapA with mutation AA108-109DD in NTerm-LapA; Gm <sup>r</sup>                   | This Study |
| pNTerm-Lap A109D           | pNTerm-LapA with mutation A109D in NTerm-LapA; Gm <sup>r</sup>                         | This Study |
| pNTerm-Lap G110A           | pNTerm-LapA with mutation G110A in NTerm-LapA; Gm <sup>r</sup>                         | This Study |
| pMQ30-LapA AA108-109RR     | allelic replacement construct for introducing <i>lapA</i> AA108-109RR; Gm <sup>r</sup> | (3)        |

|                        |                                                                                |            |
|------------------------|--------------------------------------------------------------------------------|------------|
| pMQ30-LapA AA108-109DD | allelic replacement construct for introducing AA108-109DD; Gm <sup>r</sup>     | This Study |
| pMQ30-LapA A109D       | allelic replacement construct for introducing A109D; Gm <sup>r</sup>           | This Study |
| pMQ30-LapA A108W       | allelic replacement construct for introducing A108W; Gm <sup>r</sup>           | This Study |
| pMQ30-LapA Repeats     | allelic replacement construct for deleting repeats; Gm <sup>r</sup>            | This Study |
| pMQ30-LapA vWA         | allelic replacement construct for deleting vWA; Gm <sup>r</sup>                | This Study |
| pMQ30-LapA CTerm       | allelic replacement construct for deleting CTerm; Gm <sup>r</sup>              | This Study |
| pMQ30-LapA RTX         | allelic replacement construct for deleting RTX; Gm <sup>r</sup>                | This Study |
| pMQ30-LapA T1SS        | allelic replacement construct for deleting T1SS; Gm <sup>r</sup>               | This Study |
| pMQ30-LapA A108-120A   | allelic replacement construct for deleting residues A108-120A; Gm <sup>r</sup> | This Study |

**Table S2. Oligonucleotide primers used in this study.**

| Primer |                                            | Sequence                                                             |
|--------|--------------------------------------------|----------------------------------------------------------------------|
| 1      | pMQ30 verify Fwd                           | GAGTCAGTGAGCGAGGAAG                                                  |
| 2      | pMQ72 and pMQ30 verify Rev                 | CAGACCGCTTCTGCGTTCTG                                                 |
| 3      | pMQ72 verify Fwd                           | GCAACTCTCTACTGTTTCTCC                                                |
| 4      | Delete Repeats Upstream Fwd                | AGCTATGACCATGATTACGAATTCGAGCTCGGTACCCGG<br>ATGGCACCCAGAAGGTCAATAGTTT |
| 5      | Delete Repeats Upstream Rev                | TCAGGAACATCGTATGGGTAGAGCAGGATGGTGTCGGTG<br>ACCTGAGTCG                |
| 6      | Delete Repeats Downstream<br>Fwd           | CGACTCAGGTCACCGACACCATCCTGCTCTACCCATACG<br>ATGTTCTGA                 |
| 7      | Delete Repeats Downstream<br>Rev           | AAGCTTGCATGCCTGCAGGTCGACTCTAGAGGATCCCCA<br>GCCGTCCAGATACTGCAGTTTGC   |
| 8      | Delete Repeats verify Fwd                  | GGATGGCACCCAGAAGGTCAATAGTTT                                          |
| 9      | Delete Repeats verify Fwd                  | CTGCTCTACCCATACGATGTTCTGA                                            |
| 10     | Delete Repeats verify Fwd                  | TGATGCTCGATGCGACCGCCG                                                |
| 11     | Delete Repeats verify Fwd                  | CGTGACCGATGGCGGCAACTACT                                              |
| 12     | Delete Repeats, delete helix<br>verify Rev | GATGGTGTCGGTGACCTGAGTCG                                              |
| 13     | Delete Repeats verify Rev                  | AGCCGTCCAGATACTGCAGTTTGC                                             |
| 14     | Delete Repeats verify Rev                  | CGGTGCCGTTGGTGCTGTTGG                                                |
| 15     | Delete Repeats, delete CTerm<br>verify Rev | CTGAGCAGCGTAATCTGGAACGTCATA                                          |
| 16     | Delete Repeats verify Rev                  | TGGCATCCGGCACGAAGCGCA                                                |
| 17     | Delete Repeats verify Rev                  | CATCGAGCATCACGAAGCTG                                                 |
| 18     | Delete vWA Upstream Fwd                    | AGCTATGACCATGATTACGAATTCGAGCTCGGTACCCTG<br>GCACCATCAAGATCGACATCACG   |

|    |                           |                                                                    |
|----|---------------------------|--------------------------------------------------------------------|
| 19 | Delete vWA Upstream Rev   | CTTCGACGTTTCGACAGACCGTTGGTGCCCCGGCACCACG                           |
| 20 | Delete vWA Downstream Fwd | CTGACCGTGGTGCCGGGCACCAACGGTCTGTGGAACGT<br>CGAAGCGATC               |
| 21 | Delete vWA Downstream Rev | AAGCTTGCATGCCTGCAGGTCTAGAGGATCCCCC<br>GTTGCACGTAAAACATTGAGCATCCCT  |
| 22 | Delete vWA verify Fwd     | TGGCACCATCAAGATCGACATCAGG                                          |
| 23 | Delete vWA verify Fwd     | GGTCTGTGGAACGTGGAAGCGATC                                           |
| 24 | Delete vWA verify Fwd     | ACTTTCAGCAAGGCCGACATCGAC                                           |
| 25 | Delete vWA verify Fwd     | ACAACCAGAGCGGCCCGGG                                                |
| 26 | Delete vWA verify Fwd     | GTCGACGTCAGCAAGGTCACCAC                                            |
| 27 | Delete vWA verify Fwd     | ATTCATAACCTGATTGCCGGCAGCGAT                                        |
| 28 | Delete vWA verify Rev     | GTTGGGGCACCACG                                                     |
| 29 | Delete vWA verify Rev     | CGTTGCACGTAAAACATTGAGCATCCCT                                       |
| 30 | Delete vWA verify Rev     | TGATGCTCAGGGTTTCCGAGCCGT                                           |
| 31 | Delete vWA verify Rev     | CTTGCCGCCGATGGTCACCAG                                              |
| 32 | Delete vWA verify Rev     | TGCAACAGGTCGCGCAGGTCGAT                                            |
| 33 | Delete RTX Upstream Fwd   | AGCTATGACCATGATTACGAATTCGAGCTCGGTACCCTAC<br>AACGGCCAGTTCAACCTGACCG |
| 34 | Delete RTX Upstream Rev   | AGCTATGACCATGATTACGAATTCGAGCTCGGTACCCCG<br>TGAAGCTGACCGCAACCACG    |
| 35 | Delete RTX Downstream Fwd | TGGCCTTGAAGTCCTTGATCACGTCGCACTGAGCAGCGT<br>AATCTGGAAC              |
| 36 | Delete RTX Downstream Rev | AAGCTTGCATGCCTGCAGGTCTAGAGGATCCCCA<br>GCATCGATCTGCCGTTGATTGCC      |
| 37 | Delete RTX verify Fwd     | TACAACGGCCAGTTCAACCTGACCG                                          |
| 38 | Delete RTX verify Fwd     | ACCTTCGTCTGGAAGGCCGGGC                                             |
| 39 | Delete RTX verify Fwd     | CGGCGGCACCAACTACGAGG                                               |
| 40 | Delete RTX verify Fwd     | GCAGGCCACAGCTTCACCGTGA                                             |

|    |                                        |                                                                       |
|----|----------------------------------------|-----------------------------------------------------------------------|
| 41 | Delete RTX, delete CTerm verify<br>Rev | AGCATCGATCTGCCGTTGATTGCC                                              |
| 42 | Delete RTX, delete CTerm verify<br>Rev | GCGTTGCACGTAAACATTGAGCATCC                                            |
| 43 | Delete RTX, delete CTerm verify<br>Rev | CTGGCGTACCTGAAGATCGATGGC                                              |
| 44 | Delete T1SS Upstream Fwd               | AGCTATGACCATGATTACGAATTCGAGCTCGGTACCC<br>CTCGGGGACGGTGAACATCTTCCT     |
| 45 | Delete T1SS Upstream Rev               | GGGCGGTCGTTGTTACGCATCAGTTGCCGGTGTCGCC<br>CGC                          |
| 46 | Delete T1SS Downstream Fwd             | GCGGGCGACACCGGCAACTGATGCGTGAACAACGACCG<br>CCC                         |
| 47 | Delete T1SS Downstream Rev             | AAGCTTGCATGCCTGCAGGTCGACTCTAGAGGATCCCCA<br>GCAGATGGCCGGACATGAAGAATCTT |
| 48 | Delete T1SS verify Fwd                 | TGCTGGACTCGATGGCGTCCG                                                 |
| 49 | Delete T1SS verify Fwd                 | AAGGACTCGCTGACGTCGGTGTTT                                              |
| 50 | Delete T1SS verify Fwd                 | TCGAGCCTGGCGGGCAGC                                                    |
| 51 | Delete T1SS verify Fwd                 | CTCGGGGACGGTGAACATCTTCCT                                              |
| 52 | Delete T1SS verify Fwd                 | GGCGGCCAGGCCAAGCT                                                     |
| 53 | Delete T1SS verify Fwd                 | GCCAGGTTGCCGATCATGCTGAA                                               |
| 54 | Delete T1SS verify Rev                 | AGCAGATGGCCGGACATGAAGAATCTT                                           |
| 55 | Delete T1SS verify Rev                 | GCAGGGTCAGACCATTCC                                                    |
| 56 | Delete T1SS verify Rev                 | GGATCGATGTTGGTCTGTGGCGTC                                              |
| 57 | Delete T1SS verify Rev                 | TGTAGGTGGCGAAGCTGCTGCC                                                |
| 58 | Delete T1SS verify Rev                 | GGGGCAGCTGTTCCGGTGAGC                                                 |
| 59 | Delete A108-120A<br>Upstream Fwd       | AGCTATGACCATGATTACGAATTCGAGCTCGGTACCCGG<br>CAACCGGAATGACCGTATGTTCG    |
| 60 | Delete A108-120A Upstream              | ACGAAGCTGTGGCCGCCACCGGTGGATTCAAGGGCGGT                                |

|    |                                                        |                                                                                                                              |
|----|--------------------------------------------------------|------------------------------------------------------------------------------------------------------------------------------|
|    | Rev                                                    | AGTCG                                                                                                                        |
| 61 | Delete A108-120A Downstream<br>Fwd                     | C G A C T A C C G C C C T T G A A T C C A C C G G T G G C G G C C A C A G C<br>T T C G T                                     |
| 62 | Delete A108-120A<br>Downstream Rev                     | C T T G C A T G C C T G C A G G T C G A C T C T A G A G G A T C C C C G A T G<br>G T G T C G G T G A C C T G A G T C G T     |
| 63 | <i>lapA</i> AA108-109DD point mutant<br>Upstream Fwd   | C A G C T A T G A C C A T G A T T A C G A A T T C G A G C T C G G T A C C C G<br>C T G G A T C T G G T C G T A G A T G C G C |
| 64 | <i>lapA</i> AA108-109DD point mutant<br>Upstream Rev   | G T C G T C G G T G G A T T C A A G G G C G G T A G T C                                                                      |
| 65 | <i>lapA</i> AA108-109DD point mutant<br>Downstream Fwd | G A C T A C C G C C C T T G A A T C C A C C G A C G A C G G C C C G A G C G<br>C C G C T                                     |
| 66 | <i>lapA</i> AA108-109DD point mutant<br>Downstream Rev | A A G C T T G C A T G C C T G C A G G T C G A C T C T A G A G G A T C C C C G<br>T C G C T G G C G T C G T G T T C G         |
| 67 | <i>lapA</i> A109D point mutant<br>Upstream Fwd         | C A G C T A T G A C C A T G A T T A C G A A T T C G A G C T C G G T A C C C G<br>C T G G A T C T G G T C G T A G A T G C G C |
| 68 | <i>lapA</i> A109D point mutant<br>Upstream Rev         | G T C T G C G G T G G A T T C A A G G G C G G T A G T C                                                                      |
| 69 | <i>lapA</i> A109D point mutant<br>Downstream Fwd       | G A C T A C C G C C C T T G A A T C C A C C G C A G A C G G C C C G A G C G<br>C C G C T                                     |
| 70 | <i>lapA</i> A109D point mutant<br>Downstream Rev       | A A G C T T G C A T G C C T G C A G G T C G A C T C T A G A G G A T C C C C G<br>T C G C T G G C G T C G T G T T C G         |
| 71 | <i>lapA</i> A108W point mutant<br>Upstream Fwd         | C A G C T A T G A C C A T G A T T A C G A A T T C G A G C T C G G T A C C C G<br>C T G G A T C T G G T C G T A G A T G C G C |
| 72 | <i>lapA</i> A108W point mutant<br>Upstream Rev         | G G C C C A G G T G G A T T C A A G G G C G G T A G T C                                                                      |
| 73 | <i>lapA</i> A108W point mutant<br>Downstream Fwd       | G A C T A C C G C C C T T G A A T C C A C C T G G G C C G G C C C G A G C G<br>C C G C T                                     |
| 74 | <i>lapA</i> A108W point mutant                         | A A G C T T G C A T G C C T G C A G G T C G A C T C T A G A G G A T C C C C G                                                |

|    |                                                                                                                   |                                                                        |
|----|-------------------------------------------------------------------------------------------------------------------|------------------------------------------------------------------------|
|    | Downstream Rev                                                                                                    | TCGCTGGCGTCGTGTTTCG                                                    |
| 75 | <i>lapA</i> AA108-109DD, <i>lapA</i><br>A109D, <i>lapA</i> A108W verify Rev                                       | CGGTGCGTTGCCAGCCAATG                                                   |
| 76 | Delete A108-120A verify Rev                                                                                       | GTCTGGCCTTCGGTTACCGAGGT                                                |
| 77 | Delete Repeats verify Rev                                                                                         | ACCGCTGGAGTTGTTGGCGTCG                                                 |
| 78 | Delete Repeats verify Rev                                                                                         | GGCCTTGCTGAAAGTCTGGTTGTTGG                                             |
| 79 | Delete vWA, delete T1SS verify<br>Rev                                                                             | CCCGGATCATTTCAGGTCGCTCT                                                |
| 80 | Delete vWA, delete T1SS verify<br>Rev                                                                             | GTTGCCGGTGTCGCCCGC                                                     |
| 81 | <i>lapA</i> AA108-109DD, <i>lapA</i><br>A109D, <i>lapA</i> A108W verify Fwd                                       | ACTCGGCCGAACGCAGGATC                                                   |
| 82 | Delete Repeats, Delete A108-<br>120A, delete helix verify Fwd                                                     | CGAAGGGTAGAGCCTTGAACAGGT                                               |
| 83 | Delete A108-120A, delete helix<br>verify Rev                                                                      | TGTCGATGGTGTCGGTGACCTGAGT                                              |
| 84 | Delete Repeats, Delete A108-<br>120A, <i>lapA</i> AA108-109DD, <i>lapA</i><br>A109D, <i>lapA</i> A108W verify Fwd | CATCAGGTCTATGGAAGTCAACTGAAC                                            |
| 85 | Delete Repeats, Delete A108-<br>120A, <i>lapA</i> AA108-109DD, <i>lapA</i><br>A109D, <i>lapA</i> A108W verify Fwd | AGCGCCACGCCGAGCATCA                                                    |
| 86 | Delete A108-120A verify Fwd                                                                                       | GCCGGTGTCGACCCGACTAC                                                   |
| 87 | Delete Repeats verify Fwd                                                                                         | GGCCCGAGCGCCGCTG                                                       |
| 88 | <i>lapA</i> AA108-109DD, <i>lapA</i><br>A109D, <i>lapA</i> A108W verify Rev                                       | AATCACGATCACCGCGCCGTT                                                  |
| 89 | pNTerm-Lap A108W Upstream<br>Fwd                                                                                  | ATACCCGTTTTTTTTGGGCTAGCGAATTCGAGCTCGGTACC<br>C CGGAGAGTCTTCAATGAGCAGTG |

|     |                                          |                                                                        |
|-----|------------------------------------------|------------------------------------------------------------------------|
| 90  | pNTerm-Lap A108W Upstream<br>Rev         | GGCCCAGGTGGATTCAAGGGCGGTAGTC                                           |
| 91  | pNTerm-Lap A108W<br>Downstream Fwd       | GACTACCGCCCTTGAATCCACCTGGGCCGGCCCGAGCG<br>CCGCT                        |
| 92  | pNTerm-Lap A108W<br>Downstream Rev       | CTCTAGAGGATCCCCTTAATGATGATGATGATGATGTCCA<br>ACAGTGTCGTTCCGGTGCCAG      |
| 93  | pNTerm-Lap AA108-109DD<br>Upstream Fwd   | ATACCCGTTTTTTTTGGGCTAGCGAATTCGAGCTCGGTACC<br>C CGGAGAGTCTTCAATGAGCAGTG |
| 94  | pNTerm-Lap AA108-109DD<br>Upstream Rev   | GTCGTCGGTGGATTCAAGGGCGGTAGTC                                           |
| 95  | pNTerm-Lap AA108-109DD<br>Downstream Fwd | GACTACCGCCCTTGAATCCACCGACGACGGCCCGAGCG<br>CCGCT                        |
| 96  | pNTerm-Lap AA108-109DD<br>Downstream Rev | CTCTAGAGGATCCCCTTAATGATGATGATGATGATGTCCA<br>AC GTGTCGTTCCGGTGCCAG      |
| 97  | pNTerm-Lap A109D Upstream<br>Fwd         | ATACCCGTTTTTTTTGGGCTAGCGAATTCGAGCTCGGTACC<br>CCGGAGAGTCTTCAATGAGCAGTG  |
| 98  | pNTerm-Lap A109D Upstream<br>Rev         | GTCTGCGGTGGATTCAAGGGCGGTAGTC                                           |
| 99  | pNTerm-Lap A109D<br>Downstream Fwd       | GACTACCGCCCTTGAATCCACCGCAGACGGCCCGAGCG<br>CCGCT                        |
| 100 | pNTerm-Lap A109D<br>Downstream Rev       | CTCTAGAGGATCCCCTTAATGATGATGATGATGATGTCCA<br>ACAGTGTCGTTCCGGTGCCAG      |
| 101 | pNTerm-Lap G110A Upstream<br>Fwd         | ATACCCGTTTTTTTTGGGCTAGCGAATTCGAGCTCGGTACC<br>C CGGAGAGTCTTCAATGAGCAGTG |
| 102 | pNTerm-Lap G110A Upstream<br>Rev         | GGCGGCTGCGGTGGATTCAAGGGC                                               |
| 103 | pNTerm-Lap G110A<br>Downstream Fwd       | GACTACCGCCCTTGAATCCACCGCAGCCGCCCGAGCG<br>CCGCT                         |



|     |                                        |                                                                     |
|-----|----------------------------------------|---------------------------------------------------------------------|
| 104 | pNTerm-Lap G110A<br>Downstream Rev     | CTCTAGAGGATCCCCTTAATGATGATGATGATGATGTCCA<br>ACAGTGTCGTTCCGGTGCCAG   |
| 105 | Delete helix A81-95A Upstream<br>Fwd   | AGCTATGACCATGATTACGAATTCGAGCTCGGTACCCGG<br>CAACCGGAATGACCGTATGTCCG  |
| 106 | Delete helix A81-95A Upstream<br>Rev   | GTAGTCGGGTCGACACCGGCGGTGGCTTCGGCCAGGTC<br>AGT                       |
| 107 | Delete helix A81-95A<br>Downstream Fwd | GCACTGACCTGGCCGAAGCCACCGCCGGTGTGACCCCG<br>ACTAC                     |
| 108 | Delete helix A81-95A<br>Downstream Rev | CTTGCATGCCTGCAGGTGCGACTCTAGAGGATCCCCGATG<br>GTGTCGGTGACCTGAGTCGT    |
| 109 | Delete helix verify Fwd                | GGCAACCGGAATGACCGTATGTCCG                                           |
| 110 | Delete helix verify Rev                | GGTGGCTTCGGCCAGGTCAGT                                               |
| 111 | Delete helix verify Fwd                | GCCGGTGTGACCCGACTAC                                                 |
| 112 | Delete helix verify Rev                | GATGGTGTGCGGTGACCTGAGTCGT                                           |
| 113 | Delete helix verify Rev                | TGCCCGCCGGTGTATGTTTTGC                                              |
| 114 | Delete CTerm Upstream Fwd              | AGCTATGACCATGATTACGAATTCGAGCTCGGTACCCCG<br>TGAAGCTGACCGCAACCACG     |
| 115 | Delete CTerm Upstream Rev              | TGGCCTTGAAGTCCTTGATCACGTGCGACTGAGCAGCGT<br>AATCTGGAAC               |
| 116 | Delete CTerm Downstream Fwd            | GTTCCAGATTACGCTGCTCAGTGCGACGTGATCAAGGAC<br>TTCAAGGCCA               |
| 117 | Delete CTerm Downstream Rev            | AAGCTTGCATGCCTGCAGGTGCGACTCTAGAGGATCCCCA<br>GCATCGATCTGCCGTTGATTGCC |
| 118 | Delete CTerm verify Fwd                | AAGACCACCGGCACCGTGACC                                               |
| 119 | Delete CTerm verify Fwd                | ACACCACCACTGTCAGCATCACCGG                                           |
| 120 | Delete CTerm verify Fwd                | GGTGCAGTCATCACTATCGAAGCC                                            |
| 121 | Delete CTerm verify Fwd                | CGTGAAGCTGACCGCAACCACG                                              |

**Table S3. Summary of mutations in the N-terminus of LapA and their phenotype.**

| <b>NTerm-LapA Mutants</b> | <b>Processed by<br/>LapG in vitro?</b> |
|---------------------------|----------------------------------------|
| $\Delta$ helix A81-95A    | No                                     |
| T107A                     | Yes                                    |
| A108R                     | No                                     |
| AA108-109RR               | No                                     |
| A109R                     | No                                     |
| A108W                     | No                                     |
| AA108-109WW               | Yes <sup>a</sup>                       |
| A109W                     | Yes                                    |
| A108D                     | Yes <sup>b</sup>                       |
| AA108-109DD               | No                                     |
| A109D                     | Yes <sup>b</sup>                       |
| G110A                     | Yes <sup>b</sup>                       |

<sup>a</sup>This mutation likely de-stabilized the protein as the levels of NTerm-LapA were very low and the protein difficult to detect, although it appeared that the protein was still cleaved.

<sup>b</sup>Very faint high (~25 kDa) and low (~15 kDa) molecular weight bands in WT background; only high molecular weight band present in  $\Delta$ /*lapG* background. These data indicated that the protein was unstable but still at least partially cleaved.

**Supplemental Figure 1. Mutational analysis of the LapG cleavage site. A.** Shown are images of biofilm formation of WT *P. fluorescens* Pf0-1,  $\Delta lapG$ , and LapA missense mutant variants in K10T-1 medium, with images of representative wells (top) and biofilm quantification (middle). The X axis shows the *P. fluorescens* strains and the Y axis shows the optical density at 550 nm (OD 550) of the solubilized crystal violet used to determine the bacterial biofilm biomass. The A108W and A109D variants of LapA were not significant different from the WT strain, and while the AA108-109DD double mutant did significantly enhance biofilm formation relative to the WT, the level of biofilm formation was less than that observed for the AA-RR LapA mutant or the strain in which the *lapG* gene was deleted. Western blot assay of the levels of LapA in each strain in the whole cell fraction is shown at the bottom of the panel. LapA was detected via an engineered HA tag. The expression of the LapA missense mutations in cellular extracts was similar to WT levels. \* indicates significantly different from the WT ( $P < 0.05$ ). **B.** Representative dot blot assays (top) and quantification of the pixel density of four replicates (bottom) to assess the level of cell surface LapA of WT *P. fluorescens* Pf0-1,  $\Delta lapG$ , and LapA missense variants. The change in LapA present at the cell surface of the missense variants was not significantly different from the WT. LapA was detected via an engineered HA tag. \* indicates significantly different from the WT ( $P < 0.05$ ). **C.** Western blot assay to detect a HA-tagged LapA in the supernatant fraction of WT *P. fluorescens* Pf0-1,  $\Delta lapG$ , and LapA missense variants. Missense mutations in LapA did not alter LapG-dependent cleavage of LapA due to the presence of LapA in the supernatant fraction.

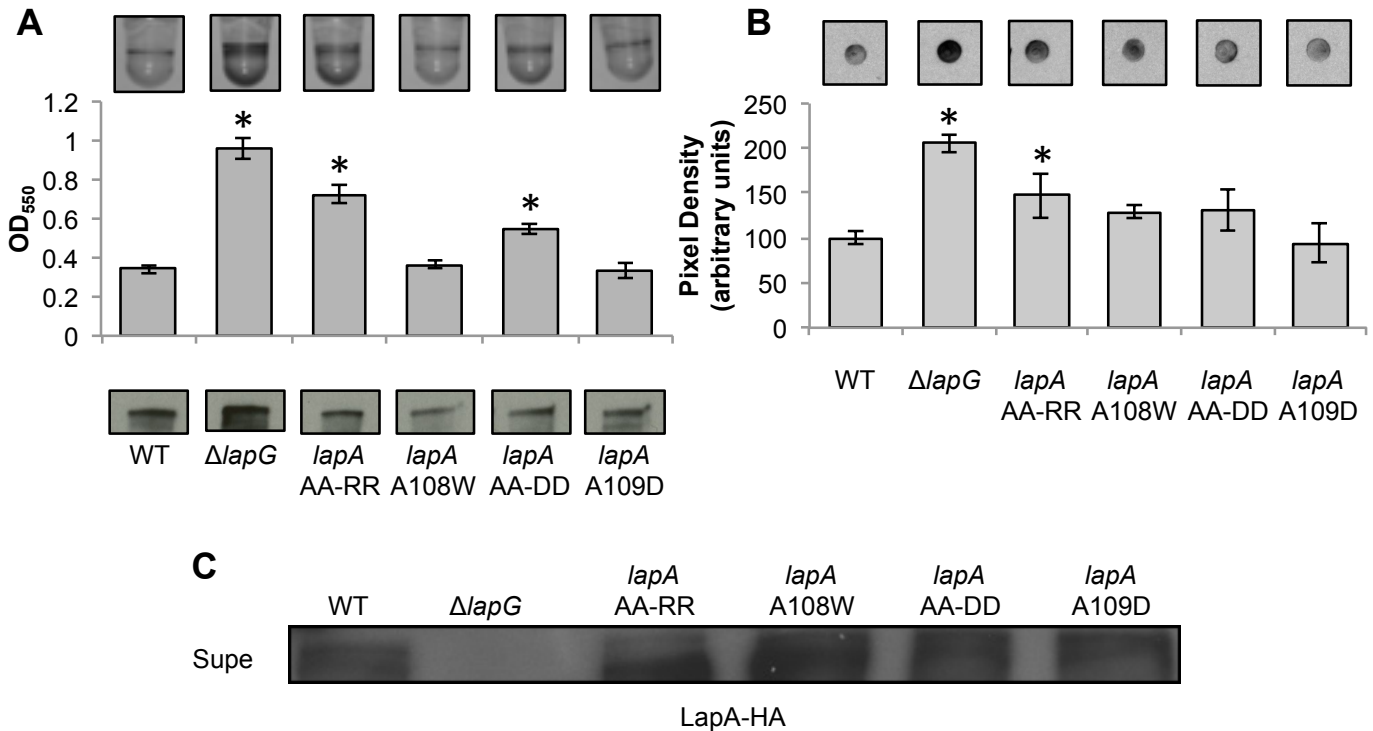



## Literature Cited.

1. **Shanks RM, Caiazza NC, Hinsa SM, Toutain CM, O'Toole GA.** 2006. *Saccharomyces cerevisiae*-based molecular tool kit for manipulation of genes from gram-negative bacteria. *Applied and environmental microbiology* **72**:5027-5036.
2. **Monds RD, Newell PD, Gross RH, O'Toole GA.** 2007. Phosphate-dependent modulation of c-di-GMP levels regulates *Pseudomonas fluorescens* Pf0-1 biofilm formation by controlling secretion of the adhesin LapA. *Molecular microbiology* **63**:656-679.
3. **Newell PD, Boyd CD, Sondermann H, O'Toole GA.** 2011. A c-di-GMP effector system controls cell adhesion by inside-out signaling and surface protein cleavage. *PLoS Biol* **9**:e1000587.
4. **Navarro MV, Newell PD, Krasteva PV, Chatterjee D, Madden DR, O'Toole GA, Sondermann H.** 2011. Structural basis for c-di-GMP-mediated inside-out signaling controlling periplasmic proteolysis. *PLoS biology* **9**:e1000588.
5. **Newell PD, Monds RD, O'Toole GA.** 2009. LapD is a bis-(3',5')-cyclic dimeric GMP-binding protein that regulates surface attachment by *Pseudomonas fluorescens* Pf0-1. *Proceedings of the National Academy of Sciences of the United States of America* **106**:3461-3466.
